# Supplementary material
Source: HighWire-hosted journal article supplement (https://cmajopen.ca/highwire/filestream/90627/field_highwire_adjunct_files/0/open-2022-0232-1-at.pdf)
Supplement: open-2022-0232-1-at.pdf [file open-2022-0232-1-at.pdf]

### **Supplementary Table S1: A description of the multiple linked databases housed at ICES which were used for this study**

Data regarding sex and death was captured through the Registered Persons Database (RPDB) Database which helped define the decedent cohort. Furthermore, information regarding: postal code, income quintile and rurality was captured through the Vital Statistics Database in conjunction with Statistics Canada census data. Information regarding physician delivered palliative care was captured through billing information contained in the Ontario Health Insurance Plan (OHIP) database. Information regarding approach to care during hospitalization was captured through the Canadian Institute for Health Information Discharge Abstract Database (CIHI-DAD). Data regarding physician practice/training demographics was captured using the Physician Service Databases (IPDB) whilst information on physicians rostering decedents was captured using the Client Agency Program Enrollment (CAPE). Decedents with recent immigration to Canada were identified through a registry maintained by Immigration, Refugees and Citizenship Canada (IRCC). Decedents were categorized into three end-of-life illness trajectories: organ failure, terminal illness and frailty on the basis of their listed cause of death. Please see supplementary materials for further details on qualifying ICD codes. Data regarding decedents inclusion in chronic disease prevalent cohorts was also captured. This method of categorizing decedents into disease prevalent groups is achieved through previously described and validated cohorting algorithms developed at ICES.(1–4)

### **Supplementary Table S2: Information regarding linked clinical/health administrative databases located at ICES (Institute for Clinical Evaluative Sciences) that were used as part of this study**

| <b>Database</b>                                                                         | <b>Description</b>                                                                                                                                                                                                                                                                                                                                                                                                                                                                                                                                                                                                                                                   |
|-----------------------------------------------------------------------------------------|----------------------------------------------------------------------------------------------------------------------------------------------------------------------------------------------------------------------------------------------------------------------------------------------------------------------------------------------------------------------------------------------------------------------------------------------------------------------------------------------------------------------------------------------------------------------------------------------------------------------------------------------------------------------|
| <b>Canadian Institute for Health Information Discharge Abstract Database (CIHI-DAD)</b> | <p><b>Contains detailed diagnostic and procedural information for all hospital admissions in Canada. Information regarding hospitalization, and specifically the methods described for categorizing approach to palliative care rely on data captured in this database</b></p> <p><b>DAD records have been demonstrated to have excellent agreement (over 99%) for demographic and administrative data. Regarding diagnoses, median agreement between original DAD records and re-abstracted records for the 50 most common most responsible diagnoses was noted to be 81% (Sensitivity 82%; Specificity 82%). The corresponding median agreement for the 50</b></p> |

most frequently performed surgical procedures was 92% (sensitivity 95%, positive predictive value 91%).(5)

**Ontario Health Insurance Plan (OHIP)**

Identifies physician billing claims and specialty on all services provided by fee-for-service physicians in Ontario and “shadow billings” for physicians paid under alternate payment plans. It also identified referring physicians for all consultations. Physician delivered palliative care was identified using billing codes found in this database

**Registered Persons Database (RPDB)**

Registry of all Ontarians eligible to receive insured health services in the province and contains detailed demographic information as well as the Local Health Integration Networks (LHIN), which defines Ontario’s 14 regional areas within which people received most of their hospital care from local hospitals. Information regarding decedent characteristics included sex, rurality, income quintile etc.

**Client Agency Program Enrolment (CAPE)**

This dataset indicates the enrolment of an individual in a program with a specific practitioner and group. A new record is created when a Registered Person enrolls in a program. The individual must be eligible for Ontario Health Insurance at the time of rostering. This

**ICES Physician Database (IPDB)**

**This database contains information regarding physicians demographics for physicians registered in the province of Ontario billing within the provincial health insurance for patient services. Data on referring physician demographics such as sex, and location of training was captured using this database**

**Immigration, Refugees and Citizenship Canada (IRCC/CIC):**

**This dataset includes immigration application records for people who initially applied to land in Ontario. Records date from 1985. The data contains permanent residents' demographic information such as country of citizenship, level of education, mother tongue, and landing date. This is a protected database with special permissions. Immigrant status for decedent cohort was identified using this database**

**Supplementary Table S3: Identification and Coding of decedents in different trajectories of death (based on cause of death)**

| Conditions Leading to Death | Criteria                                                                                                                                                                                                                                                                                                                                                                                                                                                                                                                                                                                                                                                                                                                                                                                                                                                                                                                                                                                                                                                                                                                                                                                       |
|-----------------------------|------------------------------------------------------------------------------------------------------------------------------------------------------------------------------------------------------------------------------------------------------------------------------------------------------------------------------------------------------------------------------------------------------------------------------------------------------------------------------------------------------------------------------------------------------------------------------------------------------------------------------------------------------------------------------------------------------------------------------------------------------------------------------------------------------------------------------------------------------------------------------------------------------------------------------------------------------------------------------------------------------------------------------------------------------------------------------------------------------------------------------------------------------------------------------------------------|
| Terminal Illness (Cancer)   | ICD-10 codes B24, C, D1 - D3, D40 - D48, N18, D022, D090, D010, D051, D075, D001, D015, D020, D042, D045, D059, D069, D070,                                                                                                                                                                                                                                                                                                                                                                                                                                                                                                                                                                                                                                                                                                                                                                                                                                                                                                                                                                                                                                                                    |
| Frailty (Dementia)          | ICD-10 codes A02 - A04, A08, A09, A37, A48, A49, B01, B02, B37, B95, B96, E4, E5, E60 - E64, E86, E87, E97, F00 - F03, G20 - G26^, G30 - G32, G35 - G37, G81, G82, I21, I25.0, I25.3, I25.4, I25.5, I25.6, I25.8, I25.9, I251, I69, J00 - J06, J10 - J16, J18, J20 - J22, J69, J80, K59,x L89, M00 - M03, M05 - M09, M11 - M19, M32 - M36, M41 - M43, M45, M46, M80 - M85, M91, M92, N30, R54, R63.3, R63.4                                                                                                                                                                                                                                                                                                                                                                                                                                                                                                                                                                                                                                                                                                                                                                                    |
| Organ Failure               | ICD-10 codes A15 - A19, A50 - A53, A80, A81, A86 - A89, B15 - B19, B90 - B94, D5 - D70, D71 - D77, D80 - D84, D86, D89, E00 - E07, E10 - E16, E2, E30 - E35, E65 - E68, E70 - E75.0, E75.1, E75.2, E75.3, E75.4, E75.5, E75.6, E76 - E80, E83 - E85, E88, F1, G0, G10 - G13, G40, G41, G45 - G47, G5, G60 - G64, G70 - G73, G80, G90 - G95, H0 - H8, H91 - H95, I01, I05 - I13, I15, I20, I22 - I24, I25.2, I26 - I28, I3, I4, I50 - I52, I60 - I68, I70 - I74, I77 - I79, I8, I95, I97 - I99, J30.0, J30.1, J30.2, J30.3, J30.4, J31.0, J31.1, J31.2, J32 - J38, J40 - J45, J47, J60 - J68, J70, J81, J82, J84 - J86, J90 - J94, J96, J98, J99, K0, K10 - K14, K20 - K23, K25 - K31, K35 - K38, K40 - K46, K50 - K52, K55 - K58, K60.0, K60.1, K60.2, K60.3, K60.4, K60.5, K61.0, K61.1, K61.2, K61.3, K61.4, K62, K63, K65 - K67, K70 - K73, K74.0, K74.1, K74.2, K74.3, K74.4, K74.5, K74.6, K75 - K77, K80 - K83, K85, K86, K90 - K93, L00, L01.0, L01.1, L02 - L05, L08, L10 - L14, L20 - L27, L28.0, L28.1, L28.2, L29, L30, L40 - L45, L50 - L54, L70 - L74, L93.0, L93.1, L93.2, L94, L95.0, L97 - L99, M10, M22 - M25, M30, M31, M47 - M49, M51, M73, M79, M86 - M90, M93, M94, N00 - |

|                           |                                                                                                                                                                                                                                                                                                                                                                                                                                                                                                                                                                                                                                                                                                                                                                                                                                                                                                                                       |
|---------------------------|---------------------------------------------------------------------------------------------------------------------------------------------------------------------------------------------------------------------------------------------------------------------------------------------------------------------------------------------------------------------------------------------------------------------------------------------------------------------------------------------------------------------------------------------------------------------------------------------------------------------------------------------------------------------------------------------------------------------------------------------------------------------------------------------------------------------------------------------------------------------------------------------------------------------------------------|
|                           | <p>N08, N10 - N13, N14.0, N14.1, N14.2, N14.3, N14.4, N15 - N17, N19 - N22, N25 - N29, N31 - N33, N34.0, N34.1, N34.2, N34.3, N35 - N37, N39 - N45, N47 - N51, N60 - N64, N70 - N77, N8, N90 - N96, Q00 - Q07, Q10 - Q18, Q20 - Q28, Q3, Q40 - Q45, Q50 - Q56, Q6 - Q9, J670, L732, J672, J64, J65, J678,</p>                                                                                                                                                                                                                                                                                                                                                                                                                                                                                                                                                                                                                         |
| <p>Sudden Death/Other</p> | <p><b>Sudden death:</b> R95, R96, W03, W2 – W9, W11 - W17, X, V, Y0 - Y2, Y30 Y36<br/> <b>Other:</b> ICD-10 codes A00, A01, A05 - A07, A20 - A28, A30 - A36, A38 - A44, A46, A54 - A60, A63 - A71, A74 - A79, A82, A85, A91 - A99, B00, B03 - B09, B25 - B27, B30, B33 - B36, B38, B39, B4 - B7, B80 - B83, B85 - B89, B97, B99, F04 - F07, F09, F20 - F25, F28 - F34, F38 - F45, F48, F50 - F55, F59, F6 - F9, G43, G83, G96 - G99, I00, I02, J17, J39, J95, K91, L55 - L68, L80 - L88, L90 - L92, M20, M21, M40, M50, M53, M54, M60 - M63, M65 - M68, M70 - M72, M75 - M77, M95, M96, M99, N46, N97 - N99, O00 - O08, O10 - O16, O21 - O26, O28 - O36, O40 - O48, O6, O70 - O75, O8, O90 - O92, O95 - O99, P00 - P08, P10 - P15, P2, P35 - P39, P5, P60, P61, P70 - P78, P80 - P83, P90 - P96, R0, R1, R20 - R23, R25 - R29, R3, R4, R50 - R53, R55 - R69, R7, R8, R90 - R94, R98, R99, W00 - W02, W04 - W10, W18, W19, Y4 - Y9</p> |

**Supplementary Table S4: Physician claims fee codes used to identify delivery of palliative care including location**

|                          |                                                                                                                                                                                                                                                                                                                                                                                                                                                                                                                                                                                                                                                         |
|--------------------------|---------------------------------------------------------------------------------------------------------------------------------------------------------------------------------------------------------------------------------------------------------------------------------------------------------------------------------------------------------------------------------------------------------------------------------------------------------------------------------------------------------------------------------------------------------------------------------------------------------------------------------------------------------|
| <p><i>Outpatient</i></p> | <p>A945 (without and with B codes): Special palliative care consultation in clinic, office, home; minimum 50 min</p> <ul style="list-style-type: none"> <li>· K015 (if no other fee code combination below was met): Counselling of relatives -on behalf of catastrophically or terminally ill patient</li> <li>· K023 (if no other fee code combination below was met): Palliative care support in half-hour increments; may be used to add time for longer consultations following a code for A945, or for any PC support visit. Exclude if patient is in hospital, long-term care (LTC), complex continuing care (CCC), or rehabilitation</li> </ul> |
| <p><i>Home-based</i></p> | <ul style="list-style-type: none"> <li>· A900 with (B966, B998, B997): Complex house call assessment</li> <li>· A901 with (B966, B998, B997): House call assessment</li> <li>· A945 with any B code: Special palliative care consultation</li> <li>· K023 with A900 A901 or any B code: Palliative care support</li> <li>· K015 with A900 A901 or any B code: Counselling of relatives -on behalf of catastrophically or terminally ill patient</li> </ul>                                                                                                                                                                                              |

|                           |                                                                                                                                                                                                                                                                                                                                                                                                                                                                                                                                                                                                                                                                            |
|---------------------------|----------------------------------------------------------------------------------------------------------------------------------------------------------------------------------------------------------------------------------------------------------------------------------------------------------------------------------------------------------------------------------------------------------------------------------------------------------------------------------------------------------------------------------------------------------------------------------------------------------------------------------------------------------------------------|
|                           | <ul style="list-style-type: none"> <li>· B966: Palliative care home visit; travel premium – weekdays daytime</li> <li>· B998: Palliative care home visit; special visit premium – weekdays daytime, first-person seen</li> <li>· B997: Palliative care home visit; special visit premium – nights, first-person seen</li> <li>· A900 A901 B960 B961 B962 B963 B964 B986 B987 B988 B990 B992 B993 B994 B996 within the last 3 months prior to death</li> </ul>                                                                                                                                                                                                              |
| <i>Hospital inpatient</i> | <ul style="list-style-type: none"> <li>· C945: Special palliative care consultation</li> <li>· C882: Palliative care; Non-emergency subsequent visits by the MRP following transfer from an Intensive Care Area</li> <li>· C982: Palliative care; Emergency subsequent visits by the MRP following transfer from an Intensive Care Area</li> <li>· K015 with (C945 C882 C982): Counselling of relatives -on behalf of catastrophically or terminally ill patient</li> <li>· K023 with (C945 C882 C982): Palliative care support in half-hour increments; may be used to add time for longer consultations following code for A945, or for any PC support visit.</li> </ul> |
| <i>Subacute care</i>      | <ul style="list-style-type: none"> <li>· W882: Palliative care; Long-term care subsequent visit</li> </ul>                                                                                                                                                                                                                                                                                                                                                                                                                                                                                                                                                                 |

|                                      |                                                                                                                                                                                                                                                                                                                                                                                                                                                                   |
|--------------------------------------|-------------------------------------------------------------------------------------------------------------------------------------------------------------------------------------------------------------------------------------------------------------------------------------------------------------------------------------------------------------------------------------------------------------------------------------------------------------------|
|                                      | <ul style="list-style-type: none"> <li>· W982: Palliative care; Long-term care subsequent visit (for community medicine practitioners)</li> <li>· K015 with (W882 W982): Counselling of relatives -on behalf of catastrophically or terminally ill patient</li> <li>· K023 with (W882 W982): Palliative care support in half-hour increments; may be used to add time for longer consultations following a code for A945, or for any PC support visit.</li> </ul> |
| <p><i>Third-party encounters</i></p> | <ul style="list-style-type: none"> <li>· G511: Telephone services to a patient receiving PC at home (max. 2/week)</li> <li>· G512: Weekly care case management from palliative primary care management (Monday–Sunday)</li> <li>· K700: Palliative care outpatient case conference</li> </ul>                                                                                                                                                                     |



**Supplementary Table S5A: Definition of Approach to In-Patient Palliative Care**

| Level of involvement                          | Definition                                                                                                                                                                                                                        | Example(s) of patient typology                                                                                                                                                                                                                                                                                                                                  |
|-----------------------------------------------|-----------------------------------------------------------------------------------------------------------------------------------------------------------------------------------------------------------------------------------|-----------------------------------------------------------------------------------------------------------------------------------------------------------------------------------------------------------------------------------------------------------------------------------------------------------------------------------------------------------------|
| Palliative Intent Likely (High Involvement)   | Hospitalizations in which palliative care was the <b>most responsible diagnosis</b> <i>and</i> the <b>most responsible service provider</b> .                                                                                     | Patients admitted to inpatient palliative care units.                                                                                                                                                                                                                                                                                                           |
| Palliative Intent Likely (Medium Involvement) | Hospitalizations in which palliative care was the <b>most responsible diagnosis</b> <i>or</i> the <b>most responsible service provider</b> <i>or</i> hospitalizations with involvement from a <b>palliative care specialist</b> . | Patients admitted primarily for palliative care purposes, but under the care of non-palliative care service providers, such as oncologists or general internists.<br><br>Patients who received care from a palliative care specialist (e.g., palliative care team was consulted), regardless of their admission diagnoses or most responsible service provider. |

|                            |                                                                                                                                                                                                                                                                                       |                                                                                                                                                                                                                                                                                          |
|----------------------------|---------------------------------------------------------------------------------------------------------------------------------------------------------------------------------------------------------------------------------------------------------------------------------------|------------------------------------------------------------------------------------------------------------------------------------------------------------------------------------------------------------------------------------------------------------------------------------------|
| Palliative Intent Unlikely | Hospitalizations in which <b>palliative care was a component of care</b> provided during the hospitalization, but not the primary reason for the admission (palliative care was secondary diagnosis), or hospitalizations with involvement from a <b>palliative care generalist</b> . | Patients admitted primarily for non-palliative care purposes, but for whom palliative care was a component of care.<br><br>Patients who received care from a palliative care generalist (e.g., internist), regardless of their admission diagnoses or most responsible service provider. |
|----------------------------|---------------------------------------------------------------------------------------------------------------------------------------------------------------------------------------------------------------------------------------------------------------------------------------|------------------------------------------------------------------------------------------------------------------------------------------------------------------------------------------------------------------------------------------------------------------------------------------|

|                    |                                                                                                               |                                                                                                                                                                                                       |
|--------------------|---------------------------------------------------------------------------------------------------------------|-------------------------------------------------------------------------------------------------------------------------------------------------------------------------------------------------------|
| No palliative care | Hospitalizations in which <b>no palliative care</b> indicator was identified in the administrative databases. | Patients with no indication of palliative care involvement during the admission (i.e. no palliative care diagnosis, no palliative care service provider, no palliative care physician billing claim). |
|--------------------|---------------------------------------------------------------------------------------------------------------|-------------------------------------------------------------------------------------------------------------------------------------------------------------------------------------------------------|

## Supplementary Table S5B: Criterion for categorizing the above A-D

- 1) Most Responsible Diagnosis of palliative care identified through the International Classification of Disease and Related Health Problems 10th revision (ICD-10) diagnosis code of Z51.5
- 2) The most responsible service provider was palliative care, identified through the main patient service in CIHI-DAD (PATSERV = 58).
- 3) A physician involved in the patient's care claimed a palliative care fee code during the course of the patient's hospitalization, identified through fee codes in the Ontario Health Insurance Program (OHIP) claims database.
  - a) Fee codes specific to inpatient setting:  
*C945*: Special palliative care consultation in hospital (50 minutes); may add a K023 for more time.  
*C882*: Family medicine palliative care, routine hospital inpatient service.  
*C982*: Specialist palliative care, routine hospital inpatient service.
  - b) Codes that are not setting specific:  
Any of the following fee codes if the billing physician also billed for any fee code starting with C for the same patient, during the patient's hospitalization (C codes identify care provided in an inpatient setting):  
*A945*: Special palliative care consultation in clinic, office, home (50 minutes); may add a K023 for more time.  
*K015*: Counseling of relatives—on behalf of catastrophically or terminally ill patient.  
*K023*: Palliative care support to individual, 30 minutes (may follow an A945, C945, or for any palliative care support).

**Supplementary Figure S1: Relative risk of receiving physician delivered palliative care in the last year of life according for female patients compared to male patients among 706,722 adults who died between 2010 and 2018 in Ontario, Canada. Models were adjusted for age and chronic conditions.**

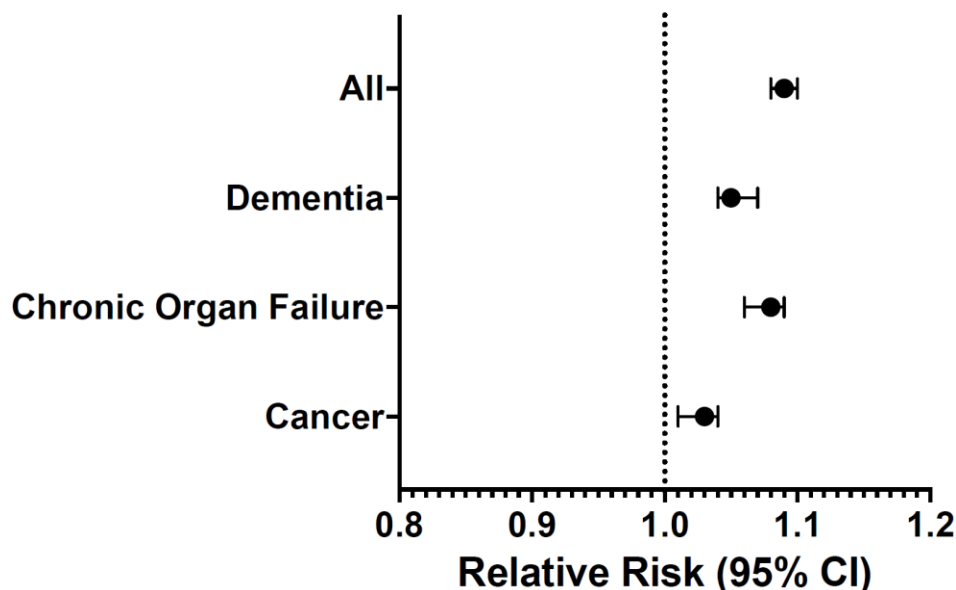

**Supplementary Table S6: Relative risk of receiving physician delivered palliative care in the last year of life according for female patients compared to male patients among 706,722 adults who died between 2010 and 2018 in Ontario, Canada. Models were adjusted for age and chronic conditions.**

|                           | Approach to palliative care (Female vs. Male) | RR Estimate | 95% CI Lower | 95% CI Upper |
|---------------------------|-----------------------------------------------|-------------|--------------|--------------|
| All                       | Palliative care intent likely                 | 1.1403      | 1.1236       | 1.157        |
|                           | Palliative care intent unlikely               | 1.0135      | 0.9997       | 1.0272       |
|                           | No palliative care intent                     | 0.9791      | 0.9762       | 0.982        |
| Dementia (Frailty)        | Palliative care intent likely                 | 1.0460      | 1.0064       | 1.0856       |
|                           | Palliative care intent unlikely               | 0.9956      | 0.9677       | 1.0236       |
|                           | No palliative care intent                     | 0.9970      | 0.9918       | 1.0022       |
| Organ Failure             | Palliative care intent likely                 | 1.1345      | 1.1014       | 1.1676       |
|                           | Palliative care intent unlikely               | 0.9943      | 0.9727       | 1.0158       |
|                           | No palliative care intent                     | 0.9901      | 0.9859       | 0.9943       |
| Cancer (Terminal Illness) | Palliative care intent likely                 | 1.1178      | 1.0977       | 1.1378       |
|                           | Palliative care intent unlikely               | 1.0493      | 1.0257       | 1.0728       |
|                           | No palliative care intent                     | 0.9587      | 0.9527       | 0.9648       |

**Supplementary Table S7: Probability of a female patient being referred to palliative care by a female physician compared to male patients (patient-physician sex concordance). Models were adjusted for patient age and chronic conditions, physician sex, location of practice, and location of medical training. (RR>1, F>M)**

| <b>Referral to Palliative Care</b> |                  |
|------------------------------------|------------------|
| <b>RR (95% CI)</b>                 |                  |
| Total Cohort                       | 1.18 (1.17-1.19) |
| Dementia                           | 1.12 (1.10-1.14) |
| Chronic Organ Failure              | 1.15 (1.13-1.16) |
| Cancer                             | 1.25 (1.23-1.26) |

**Supplementary Table S8: Probability of a male patient being referred to palliative care by a male physician compared to female patients (patient-physician sex concordance). Models were adjusted for patient age and chronic conditions, physician sex, location of practice, and location of medical training. (RR>1, M>F)**

| <b>Referral to Palliative Care</b> |                  |
|------------------------------------|------------------|
| <b>RR (95% CI)</b>                 |                  |
| Total Cohort                       | 1.20 (1.19-1.21) |
| Dementia                           | 1.15 (1.13-1.17) |
| Chronic Organ Failure              | 1.17 (1.16-1.19) |
| Cancer                             | 1.24 (1.23-1.26) |

**Supplementary Table S9: Prevalent users (those receiving physician delivered palliative care within 720 days to 360 days of death) stratified by patient sex**

| Sex | Frequency | Percent |
|-----|-----------|---------|
| F   | 21438     | 54.58   |
| M   | 17843     | 45.42   |

**Supplementary Table S10: Cohort characteristics of decedents who received at least 1 instance of physician-delivered palliative care within their last year of life**

| CHARACTERISTICS               |              | Female          | Male            | STANDARDIZED DIFFERENCE |
|-------------------------------|--------------|-----------------|-----------------|-------------------------|
| Total Patients                |              | N=192,022       | N=185,476       |                         |
| Age                           | Mean ± SD    | 78.44 ± 13.33   | 75.48 ± 12.60   | 0.23                    |
|                               | Median (IQR) | 81 (70-88)      | 78 (67-85)      | 0.27                    |
|                               | 30-39        | 1,288 (0.7%)    | 1,087 (0.6%)    | 0.01                    |
|                               | 40-49        | 4,504 (2.3%)    | 4,264 (2.3%)    | 0                       |
|                               | 50-59        | 13,172 (6.9%)   | 15,758 (8.5%)   | 0.06                    |
|                               | 60-69        | 25,465 (13.3%)  | 32,741 (17.7%)  | 0.12                    |
|                               | 70-79        | 40,552 (21.1%)  | 49,181 (26.5%)  | 0.13                    |
|                               | 80-89        | 66,765 (34.8%)  | 61,610 (33.2%)  | 0.03                    |
|                               | 90-99        | 37,828 (19.7%)  | 19,829 (10.7%)  | 0.25                    |
|                               | 100-109      | 1,989 (1.0%)    | 448 (0.2%)      | 0.1                     |
|                               | >=110        | *1 - 5          | 0 (0.0%)        | 0.01                    |
| Rural Residence               | missing      | 330 (0.2%)      | 289 (0.2%)      | 0                       |
|                               | N            | 168,773 (87.9%) | 160,239 (86.4%) | 0.04                    |
|                               | Y            | 22,919 (11.9%)  | 24,948 (13.5%)  | 0.05                    |
| Neighbourhood Income Quintile | missing      | 841 (0.4%)      | 718 (0.4%)      | 0.01                    |
|                               | 1            | 46,233 (24.1%)  | 40,620 (21.9%)  | 0.05                    |

|                                       |                                                |                 |                 |      |
|---------------------------------------|------------------------------------------------|-----------------|-----------------|------|
|                                       | 2                                              | 41,312 (21.5%)  | 40,084 (21.6%)  | 0    |
|                                       | 3                                              | 37,015 (19.3%)  | 36,322 (19.6%)  | 0.01 |
|                                       | 4                                              | 34,125 (17.8%)  | 34,590 (18.6%)  | 0.02 |
|                                       | 5                                              | 32,496 (16.9%)  | 33,142 (17.9%)  | 0.02 |
| Recent Immigration Status             | Not Immigrants                                 | 180,452 (94.0%) | 174,756 (94.2%) | 0.01 |
|                                       | Economic Immigrants                            | 2,128 (1.1%)    | 2,605 (1.4%)    | 0.03 |
|                                       | Other immigrants                               | 379 (0.2%)      | 327 (0.2%)      | 0    |
|                                       | Resettled Refugee & Protected Person in Canada | 1,197 (0.6%)    | 1,749 (0.9%)    | 0.04 |
|                                       | Sponsored family Immigrants                    | 7,866 (4.1%)    | 6,039 (3.3%)    | 0.04 |
| Myocardial Infarction                 |                                                | 20,084 (10.5%)  | 25,291 (13.6%)  | 0.1  |
| Congestive Heart Failure              |                                                | 43,298 (22.5%)  | 42,123 (22.7%)  | 0    |
| Peripheral Vascular Disease           |                                                | 10,303 (5.4%)   | 14,706 (7.9%)   | 0.1  |
| Cerebrovascular Disease               |                                                | 25,736 (13.4%)  | 23,950 (12.9%)  | 0.01 |
| Dementia                              |                                                | 35,455 (18.5%)  | 28,875 (15.6%)  | 0.08 |
| Chronic Obstructive Pulmonary Disease |                                                | 33,135 (17.3%)  | 36,270 (19.6%)  | 0.06 |
| Connective tissue / rheumatic disease |                                                | 4,526 (2.4%)    | 2,011 (1.1%)    | 0.1  |
| Peptic Ulcer Disease                  |                                                | 6,350 (3.3%)    | 8,651 (4.7%)    | 0.07 |
| Mild Liver Disease                    |                                                | 2,827 (1.5%)    | 4,769 (2.6%)    | 0.08 |
| Diabetes without complications        |                                                | 13,566 (7.1%)   | 14,594 (7.9%)   | 0.03 |
| Diabetes with complications           |                                                | 34,322 (17.9%)  | 43,215 (23.3%)  | 0.13 |

|                                                    |         |                 |                 |      |
|----------------------------------------------------|---------|-----------------|-----------------|------|
| Hemiplegia or Paraplegia                           |         | 6,436 (3.4%)    | 6,427 (3.5%)    | 0.01 |
| Renal Disease                                      |         | 20,326 (10.6%)  | 26,497 (14.3%)  | 0.11 |
| Primary Cancer                                     |         | 29,208 (15.2%)  | 39,715 (21.4%)  | 0.16 |
| Moderate or Severe Liver Disease                   |         | 4,829 (2.5%)    | 8,234 (4.4%)    | 0.11 |
| Metastatic Cancer                                  |         | 55,251 (28.8%)  | 59,581 (32.1%)  | 0.07 |
| HIV/AIDS                                           |         | 67 (0.0%)       | 307 (0.2%)      | 0.04 |
| Frailty Score                                      | 0       | 17,601 (9.2%)   | 16,997 (9.2%)   | 0    |
|                                                    | 0.1-8.9 | 82,960 (43.2%)  | 87,401 (47.1%)  | 0.08 |
|                                                    | 9+      | 80,000 (41.7%)  | 75,287 (40.6%)  | 0.02 |
|                                                    | Missing | 11,461 (6.0%)   | 5,791 (3.1%)    | 0.14 |
| Cancer prevalent                                   |         | 111,461 (58.0%) | 127,528 (68.8%) | 0.22 |
| Cirrhosis prevalent                                |         | 1,039 (0.5%)    | 3,142 (1.7%)    | 0.11 |
| CHF prevalent                                      |         | 64,927 (33.8%)  | 61,881 (33.4%)  | 0.01 |
| COPD prevalent                                     |         | 44,889 (23.4%)  | 50,759 (27.4%)  | 0.09 |
| Coronary prevalent                                 |         | 31,649 (16.5%)  | 46,731 (25.2%)  | 0.22 |
| Non-psychotic Mood and Anxiety Disorders prevalent |         | 55,072 (28.7%)  | 42,635 (23.0%)  | 0.13 |
| Dementia prevalent                                 |         | 49,365 (25.7%)  | 35,054 (18.9%)  | 0.16 |
| Diabetes prevalent                                 |         | 64,200 (33.4%)  | 73,608 (39.7%)  | 0.13 |
| Hypertension prevalent                             |         | 151,682 (79.0%) | 141,687 (76.4%) | 0.06 |
| (Other) Mental Health Conditions prevalent         |         | 28,167 (14.7%)  | 34,313 (18.5%)  | 0.1  |
| Renal Disease prevalent                            |         | 46,778 (24.4%)  | 55,449 (29.9%)  | 0.12 |
| Stroke prevalent                                   |         | 22,944 (11.9%)  | 20,822 (11.2%)  | 0.02 |



|                   |                    |                 |                 |      |
|-------------------|--------------------|-----------------|-----------------|------|
| Secondary Outcome | High Involvement   | 8,342 (4.3%)    | 6,993 (3.8%)    | 0.03 |
|                   | Medium Involvement | 24,708 (12.9%)  | 23,363 (12.6%)  | 0.01 |
|                   | Low involvement    | 25,080 (13.1%)  | 24,530 (13.2%)  | 0    |
|                   | No Palliative Care | 133,892 (69.7%) | 130,590 (70.4%) | 0.01 |

## References

1. Tu K, Campbell NR, Chen ZL, Cauch-Dudek KJ, Mcalister FA. Accuracy of administrative databases in identifying patients with hypertension. *Open Medicine*. 2007;1(1):1–8.
2. Hux JE, Ivis F, Flintoft V, Bica A. Diabetes in Ontario Determination of prevalence and incidence using a validated administrative data algorithm. *Diabetes Care* [Internet]. 2002 Mar 1 [cited 2022 Feb 7];25(3):512–6. Available from: <https://diabetesjournals.org/care/article/25/3/512/21950/Diabetes-in-Ontario-Determination-of-prevalence-and>
3. Liisa Jaakkimainen R, Bronskill SE, Tierney MC, Herrmann N, Green D, Young J, et al. Identification of Physician-Diagnosed Alzheimer’s Disease and Related Dementias in Population-Based Administrative Data: A Validation Study Using Family Physicians’ Electronic Medical Records. *Journal of Alzheimer’s Disease*. 2016 Jan 1;54(1):337–49.
4. Austin PC, Daly PA, Tu J v. A multicenter study of the coding accuracy of hospital discharge administrative data for patients admitted to cardiac care units in Ontario. *Am Heart J*. 2002 Aug 1;144(2):290–6.
5. Juurlink D, Preyra C, Croxford R, Chong A, Austin P, Tu J. Canadian Institute for health information Discharge Abstract database: a validation study. Toronto. 2006;
